# Supplementary material
Source: bioRxiv or medRxiv preprint supplement (https://www.biorxiv.org/highwire/filestream/101088/field_highwire_adjunct_files/7/324509-16.pdf)
Supplement: Supplementary file [file 324509-16.pdf]

Supplementary Table 8. Output from 3SEQ recombination algorithm

| ID                                                       | P ACCNUM       | Q ACCNUM       | C ACCNUM         | m  | n  | k  | p | HS?    | log(p) | DS(p)    | DS(p)    | min rec length       | breakpoints           |
|----------------------------------------------------------|----------------|----------------|------------------|----|----|----|---|--------|--------|----------|----------|----------------------|-----------------------|
| 601                                                      | 601_D14_MB17   | 601_D14_MC13   | 601_W29_P2_F8    | 77 | 92 | 62 | 0 | 0      | -14.57 | 0        | 3.77E-10 | 1094                 | 580-582 & 2254-2254   |
|                                                          | 601_D14_MB17   | 601_D14_MC13   | 601_W29_P2_F3    | 77 | 92 | 62 | 0 | 0      | -14.57 | 0        | 3.77E-10 | 1094                 | 580-582 & 2254-2254   |
|                                                          | 601_D14_MB17   | 601_D14_MC13   | 601_W29_P2_E8    | 77 | 92 | 62 | 0 | 0      | -14.57 | 0        | 3.77E-10 | 1094                 | 580-582 & 2254-2254   |
|                                                          | 601_D14_MB17   | 601_D14_MC13   | 601_W29_P1_b9    | 77 | 92 | 62 | 0 | 0      | -14.57 | 0        | 3.77E-10 | 1094                 | 580-582 & 2254-2254   |
|                                                          | 601_D14_MB17   | 601_D14_MC13   | 601_W29_P2_d8    | 77 | 92 | 62 | 0 | 0      | -14.57 | 0        | 3.77E-10 | 1094                 | 580-582 & 2254-2254   |
|                                                          | 601_D14_MB17   | 601_D14_MC13   | 601_W29_P1_g6    | 77 | 92 | 62 | 0 | 0      | -14.57 | 0        | 3.77E-10 | 1094                 | 580-582 & 2254-2254   |
|                                                          | 601_D14_MB17   | 601_D14_MC13   | 601_W29_P1_f4    | 77 | 92 | 62 | 0 | 0      | -14.57 | 0        | 3.77E-10 | 1094                 | 580-582 & 2254-2254   |
|                                                          | 601_D14_MB17   | 601_D14_MC13   | 601_W29_P1_d9    | 77 | 92 | 62 | 0 | 0      | -14.57 | 0        | 3.77E-10 | 1094                 | 580-582 & 2254-2254   |
|                                                          | 601_D14_MB17   | 601_D14_MC13   | 601_W29_P1_b12   | 77 | 92 | 62 | 0 | 0      | -14.57 | 0        | 3.77E-10 | 1094                 | 580-582 & 2254-2254   |
|                                                          | 601_D14_MB17   | 601_D14_MC13   | 601_W29_P1_b5    | 77 | 92 | 62 | 0 | 0      | -14.57 | 0        | 3.77E-10 | 1094                 | 580-582 & 2254-2254   |
|                                                          | 601_D14_MB17   | 601_D14_MC13   | 601_W29_A10      | 77 | 92 | 62 | 0 | 0      | -14.57 | 0        | 3.77E-10 | 1094                 | 580-582 & 2254-2254   |
|                                                          | 601_D14_MB17   | 601_D14_MC13   | 601_W29_B10      | 77 | 92 | 62 | 0 | 0      | -14.57 | 0        | 3.77E-10 | 1094                 | 580-582 & 2254-2254   |
|                                                          | 601_D14_MB17   | 601_D14_MC13   | 601_W29_C9       | 77 | 92 | 62 | 0 | 0      | -14.57 | 0        | 3.77E-10 | 1094                 | 580-582 & 2254-2254   |
|                                                          | 601_D14_MB17   | 601_D14_MC13   | 601_W29_D3       | 77 | 92 | 62 | 0 | 0      | -14.57 | 0        | 3.77E-10 | 1094                 | 580-582 & 2254-2254   |
|                                                          | 601_D14_MB17   | 601_D14_MC13   | 601_W29_D8       | 77 | 92 | 62 | 0 | 0      | -14.57 | 0        | 3.77E-10 | 1094                 | 580-582 & 2254-2254   |
|                                                          | 601_D14_MB17   | 601_D14_MC13   | 601_W29_E3       | 77 | 92 | 62 | 0 | 0      | -14.57 | 0        | 3.77E-10 | 1094                 | 580-582 & 2254-2254   |
|                                                          | 601_D14_MB17   | 601_D14_MC13   | 601_W29_E4       | 77 | 92 | 62 | 0 | 0      | -14.57 | 0        | 3.77E-10 | 1094                 | 580-582 & 2254-2254   |
|                                                          | 601_D14_MB17   | 601_D14_MC13   | 601_W29_E10      | 77 | 92 | 62 | 0 | 0      | -14.57 | 0        | 3.77E-10 | 1094                 | 580-582 & 2254-2254   |
|                                                          | 601_D14_MB17   | 601_D14_MC13   | 601_W29_G4       | 77 | 92 | 62 | 0 | 0      | -14.57 | 0        | 3.77E-10 | 1094                 | 580-582 & 2254-2254   |
|                                                          | 601_D14_MB17   | 601_D14_MC13   | 601_W29_G10      | 77 | 92 | 62 | 0 | 0      | -14.57 | 0        | 3.77E-10 | 1094                 | 580-582 & 2254-2254   |
|                                                          | 601_D14_MB17   | 601_D14_MC13   | 601_W29_H4       | 77 | 92 | 62 | 0 | 0      | -14.57 | 0        | 3.77E-10 | 1094                 | 580-582 & 2254-2254   |
|                                                          | 601_D14_MB17   | 601_D14_MC13   | 601_W29_H5       | 77 | 92 | 62 | 0 | 0      | -14.57 | 0        | 3.77E-10 | 1094                 | 580-582 & 2254-2254   |
|                                                          | 601_D14_MB17   | 601_D14_MC13   | 601_W29_H8       | 77 | 92 | 62 | 0 | 0      | -14.57 | 0        | 3.77E-10 | 1094                 | 580-582 & 2254-2254   |
|                                                          | 601_D14_MB17   | 601_D14_MC13   | 601_W29_P1_a1    | 77 | 92 | 62 | 0 | 0      | -14.57 | 0        | 3.77E-10 | 1094                 | 580-582 & 2254-2254   |
|                                                          | 601_D14_MB17   | 601_D14_MC13   | 601_W29_P1_a4    | 77 | 92 | 62 | 0 | 0      | -14.57 | 0        | 3.77E-10 | 1094                 | 580-582 & 2254-2254   |
|                                                          | 601_D14_MB17   | 601_D14_MC13   | 601_W29_P2_C4    | 77 | 92 | 62 | 0 | 0      | -14.57 | 0        | 3.77E-10 | 1094                 | 580-582 & 2254-2254   |
|                                                          | 601_D14_MB17   | 601_D14_MC13   | 601_W29_P1_d11   | 77 | 92 | 62 | 0 | 0      | -14.57 | 0        | 3.77E-10 | 1094                 | 580-582 & 2254-2254   |
|                                                          | 601_D14_MB17   | 601_D14_MC13   | 601_W29_P2_G2    | 77 | 92 | 62 | 0 | 0      | -14.57 | 0        | 3.77E-10 | 1094                 | 580-582 & 2254-2254   |
|                                                          | 601_D14_MB17   | 601_D14_MC13   | 601_W29_P2_D5    | 78 | 91 | 60 | 0 | 0      | -14    | 0        | 1.42E-09 | 1094                 | 580-582 & 2254-2254   |
|                                                          | 601_D14_MB17   | 601_D14_MC13   | 601_W29_P2_G3    | 77 | 92 | 62 | 0 | 0      | -14.57 | 0        | 3.77E-10 | 1094                 | 580-582 & 2254-2254   |
|                                                          | 601_D14_MB17   | 601_D14_MC13   | 601_W29_P3_A12   | 77 | 92 | 62 | 0 | 0      | -14.57 | 0        | 3.77E-10 | 1094                 | 580-582 & 2254-2254   |
|                                                          | 601_D14_MB17   | 601_D14_MC13   | 601_W29_P3_C7    | 77 | 92 | 62 | 0 | 0      | -14.57 | 0        | 3.77E-10 | 1094                 | 580-582 & 2254-2254   |
|                                                          | 601_D14_MB17   | 601_D14_MC13   | 601_W29_P3_D1    | 77 | 92 | 62 | 0 | 0      | -14.57 | 0        | 3.77E-10 | 1094                 | 580-582 & 2254-2254   |
|                                                          | 601_D14_MB17   | 601_D14_MC13   | 601_W29_P3_D11   | 77 | 92 | 62 | 0 | 0      | -14.57 | 0        | 3.77E-10 | 1094                 | 580-582 & 2254-2254   |
|                                                          | 601_D14_MB17   | 601_D14_MC13   | 601_W29_P3_G1    | 77 | 92 | 62 | 0 | 0      | -14.57 | 0        | 3.77E-10 | 1094                 | 580-582 & 2254-2254   |
|                                                          | 601_D14_MB17   | 601_D14_MC13   | 601_W29_P3_G7    | 76 | 93 | 62 | 0 | 0      | -13.86 | 0        | 1.94E-09 | 1094                 | 580-582 & 2254-2254   |
|                                                          | 601_D14_MB17   | 601_D14_MC13   | 601_W29_P3_H7    | 77 | 92 | 62 | 0 | 0      | -14.57 | 0        | 3.77E-10 | 1094                 | 580-582 & 2254-2254   |
|                                                          | 601_D14_MB17   | 601_D14_MC13   | 601_W29_P3_H10   | 77 | 92 | 62 | 0 | 0      | -14.57 | 0        | 3.77E-10 | 1094                 | 580-582 & 2254-2254   |
|                                                          | 601_D14_MB17   | 601_D14_MC13   | 601_W29_P4_c9    | 77 | 92 | 62 | 0 | 0      | -14.57 | 0        | 3.77E-10 | 1094                 | 580-582 & 2254-2254   |
|                                                          | 601_D14_MB17   | 601_D14_MC13   | 601_W29_P2_G6    | 77 | 92 | 62 | 0 | 0      | -14.57 | 0        | 3.77E-10 | 1094                 | 580-582 & 2254-2254   |
|                                                          | 601_D14_ME10   | 601_D14_2E_19  | 601_W29_P4_a2    | 89 | 48 | 42 | 0 | 0      | -25.57 | 0        | 3.79E-21 | 198                  | 352-391 & 642-673     |
|                                                          | 601_D14_ME10   | 601_D14_2E_19  | 601_W29_P4_C5    | 89 | 48 | 42 | 0 | 0      | -25.57 | 0        | 3.79E-21 | 198                  | 352-391 & 642-673     |
|                                                          | 601_D14_ME10   | 601_D14_2E_19  | 601_W29_P4_C10   | 89 | 48 | 42 | 0 | 0      | -25.57 | 0        | 3.79E-21 | 198                  | 352-391 & 642-673     |
|                                                          | 601_D14_ME10   | 601_D14_2E_19  | 601_W29_P4_H7    | 89 | 48 | 42 | 0 | 0      | -25.57 | 0        | 3.79E-21 | 198                  | 352-391 & 642-673     |
| 601_D14_ME10                                             | 601_D14_2E_19  | 601_W29_E11    | 89               | 48 | 42 | 0  | 0 | -25.57 | 0      | 3.79E-21 | 198      | 352-391 & 642-673    |                       |
| 601_D14_ME10                                             | 601_D14_2E_19  | 601_W29_P4_d6  | 88               | 49 | 42 | 0  | 0 | -24.57 | 0      | 3.78E-20 | 198      | 352-391 & 642-673    |                       |
| 601_D14_MB17                                             | 601_D14_MC13   | 601_W29_A1     | 77               | 92 | 62 | 0  | 0 | -14.57 | 0      | 3.77E-10 | 1094     | 580-582 & 2254-2254  |                       |
| 601_D14_MB17                                             | 601_D14_MC13   | 601_W29_A3     | 77               | 92 | 62 | 0  | 0 | -14.57 | 0      | 3.77E-10 | 1094     | 580-582 & 2254-2254  |                       |
| 601_W29_P4_a2/601_W29_P4_C5/601_W29_P4_C10/601_W29_P4_H7 |                |                |                  |    |    |    |   |        |        |          |          |                      |                       |
| 601_D14_2G_10                                            | 601_D14_2G_10  | 601_W29_A11    | 87               | 49 | 30 | 0  | 0 | -12.81 | 0      | 2.16E-08 | 137      | 352-455 & 645-673    |                       |
| 601_W29_P4_a2/601_W29_P4_C5/601_W29_P4_H7                |                |                |                  |    |    |    |   |        |        |          |          |                      |                       |
| 601_D14_2G_10                                            | 601_D14_2G_10  | 601_W29_C7     | 87               | 49 | 30 | 0  | 0 | -12.81 | 0      | 2.16E-08 | 137      | 352-455 & 645-673    |                       |
| 601_D14_2G_10                                            | 601_W29_P4_H7  | 601_W29_H6     | 96               | 43 | 35 | 0  | 0 | -21.83 | 0      | 2.06E-17 | 73       | 352-455 & 581-637    |                       |
| 601_D14_2G_10                                            | 601_W29_P4_C10 | 601_W29_H6     | 96               | 43 | 35 | 0  | 0 | -21.83 | 0      | 2.06E-17 | 73       | 352-455 & 581-637    |                       |
| 601_D14_2G_10                                            | 601_W29_P4_C5  | 601_W29_H6     | 96               | 43 | 35 | 0  | 0 | -21.83 | 0      | 2.06E-17 | 73       | 352-455 & 581-637    |                       |
| 601_D14_2G_10                                            | 601_W29_P4_a2  | 601_W29_H6     | 96               | 43 | 35 | 0  | 0 | -21.83 | 0      | 2.06E-17 | 73       | 352-455 & 581-637    |                       |
| 602                                                      | 602_W23_2Q_2   | 602_W23_2M_11  | 602_W28_P1_F1    | 24 | 44 | 38 | 0 | 0      | -8.9   | 2E-04    | 1.79E-04 | 586                  | 466-639 & 2550-2802   |
|                                                          | 602_W23_2Q_2   | 602_W23_2M_11  | 602_W28_P2_A8    | 24 | 44 | 38 | 0 | 0      | -8.9   | 2E-04    | 1.79E-04 | 586                  | 466-639 & 2550-2802   |
|                                                          | 602_W23_2Q_2   | 602_W23_2M_11  | 602_W28_P3_h7    | 24 | 44 | 38 | 0 | 0      | -8.9   | 2E-04    | 1.79E-04 | 586                  | 466-639 & 2550-2802   |
|                                                          | 602_W23_2Q_2   | 602_W23_2M_11  | 602_W28_P4_C5    | 24 | 44 | 38 | 0 | 0      | -8.9   | 2E-04    | 1.79E-04 | 586                  | 466-639 & 2550-2802   |
|                                                          | 602_W23_2Q_2   | 602_W23_2M_11  | 602_W28_P4_C7    | 24 | 44 | 38 | 0 | 0      | -8.9   | 2E-04    | 1.79E-04 | 586                  | 466-639 & 2550-2802   |
|                                                          | 602_W23_2Q_2   | 602_W23_2M_11  | 602_W28_P3_b7    | 24 | 44 | 38 | 0 | 0      | -8.9   | 2E-04    | 1.79E-04 | 586                  | 466-639 & 2550-2802   |
|                                                          | 602_W23_2Q_2   | 602_W23_2M_11  | 602_W28_P3_b6    | 24 | 44 | 38 | 0 | 0      | -8.9   | 2E-04    | 1.79E-04 | 586                  | 466-639 & 2550-2802   |
|                                                          | 602_W23_2Q_2   | 602_W23_2M_11  | 602_W28_P3_b5    | 24 | 44 | 38 | 0 | 0      | -8.9   | 2E-04    | 1.79E-04 | 586                  | 466-639 & 2550-2802   |
|                                                          | 602_W23_2Q_2   | 602_W23_2M_11  | 602_W28_P4_H5    | 24 | 44 | 38 | 0 | 0      | -8.9   | 2E-04    | 1.79E-04 | 586                  | 466-639 & 2550-2802   |
|                                                          | 602_W23_2Q_2   | 602_W23_2M_11  | 602_W28_P4_E3    | 24 | 44 | 38 | 0 | 0      | -8.9   | 2E-04    | 1.79E-04 | 586                  | 466-639 & 2550-2802   |
|                                                          | 602_W23_2Q_2   | 602_W23_2M_11  | 602_W28_P3_e12   | 24 | 44 | 38 | 0 | 0      | -8.9   | 2E-04    | 1.79E-04 | 586                  | 466-639 & 2550-2802   |
|                                                          | 602_W23_2Q_2   | 602_W23_2M_11  | 602_W28_P3_d4    | 24 | 44 | 38 | 0 | 0      | -8.9   | 2E-04    | 1.79E-04 | 586                  | 466-639 & 2550-2802   |
|                                                          | 602_W23_2Q_2   | 602_W23_2M_11  | 602_W28_P4_F5    | 30 | 38 | 34 | 0 | 0      | -11.94 | 0        | 1.65E-07 | 765                  | 1586-1660 & 2550-2802 |
|                                                          | 602_W23_2Q_2   | 602_W23_2M_11  | 602_W28_P4_E6    | 31 | 38 | 31 | 0 | 0      | -9.218 | 9E-05    | 8.63E-05 | 765                  | 1586-1660 & 2550-2802 |
|                                                          | 602_W23_2Q_2   | 602_W23_2M_11  | 602_W28_P4_A1    | 31 | 38 | 31 | 0 | 0      | -9.218 | 9E-05    | 8.63E-05 | 765                  | 1586-1660 & 2550-2802 |
|                                                          | 602_W23_2Q_2   | 602_W23_2M_11  | 602_W28_P3_a4    | 31 | 38 | 31 | 0 | 0      | -9.218 | 9E-05    | 8.63E-05 | 765                  | 1586-1660 & 2550-2802 |
|                                                          | 602_W23_2Q_2   | 602_W23_2M_11  | 602_W28_P_TIT_B9 | 31 | 38 | 31 | 0 | 0      | -9.218 | 9E-05    | 8.63E-05 | 765                  | 1586-1660 & 2550-2802 |
|                                                          | 602_W23_2Q_2   | 602_W23_2M_11  | 602_W28_P3_d8    | 31 | 38 | 31 | 0 | 0      | -9.218 | 9E-05    | 8.63E-05 | 765                  | 1586-1660 & 2550-2802 |
|                                                          | 602_W23_2Q_2   | 602_W23_2M_11  | 602_W28_P3_f12   | 27 | 44 | 39 | 0 | 0      | -11.02 | 0        | 1.35E-06 | 932                  | 977-1186 & 2550-2802  |
|                                                          | 602_W23_2Q_2   | 602_W23_2M_11  | 602_W28_P4_H9    | 27 | 44 | 39 | 0 | 0      | -11.02 | 0        | 1.35E-06 | 932                  | 977-1186 & 2550-2802  |
| 602_W23_2Q_2                                             | 602_W23_2M_11  | 602_W28_P4_G10 | 27               | 43 | 38 | 0  | 0 | -10.85 | 0      | 2.02E-06 | 932      | 977-1186 & 2550-2802 |                       |
| 602_W23_2Q_2                                             | 602_W23_2T_15  | 602_W28_P3_f8  | 30               | 43 | 36 | 0  | 0 | -9.899 | 2E-05  | 1.80E-05 | 894      | 945-976 & 2550-2810  |                       |
| 602_W23_2Q_2                                             | 602_W23_2T_15  | 602_W28_P3_a6  | 32               | 41 | 35 | 0  | 0 | -11.08 | 0      | 1.18E-06 | 894      | 945-976 & 2550-2810  |                       |
| 602_W23_2Q_2                                             | 602_W23_2T_15  | 602_W28_P4_G1  | 32               | 41 | 35 | 0  | 0 | -11.08 | 0      | 1.18E-06 | 894      | 945-976 & 2550-2810  |                       |
| 602_W23_2Q_2                                             | 602_W23_2T_15  | 602_W28_P4_A5  | 30               | 43 | 36 | 0  | 0 | -9.899 | 2E-05  | 1.80E-05 | 894      | 945-976 & 2550-2810  |                       |
| 602_W23_2Q_2                                             | 602_W23_2T_15  | 602_W28_P4_D9  | 30               | 43 | 36 | 0  | 0 | -9.899 | 2E-05  | 1.80E-05 | 894      | 945-976 & 2550-2810  |                       |
| 602_W23_2Q_2                                             | 602_W23_2T_15  | 602_W28_P3_f4  | 32               | 41 | 35 | 0  | 0 | -11.08 | 0      | 1.18E-06 | 894      | 945-976 & 2550-2810  |                       |
| 602_W23_2Q_2                                             | 602_W23_2T_15  | 602_W28_P4_F3  | 30               | 43 | 36 | 0  | 0 | -9.899 | 2E-05  | 1.80E-05 | 894      | 945-976 & 2550-2810  |                       |
| 602_W23_2Q_2                                             | 602_W23_2T_15  | 602_W28_P4_H3  | 30               | 43 | 36 | 0  | 0 |        |        |          |          |                      |                       |

Supplementary Table 8 continued. Output from 3SEQ recombination algorithm

| ID            | P ACCNUM         | Q ACCNUM       | C ACCNUM       | m           | n   | k  | p      | HS? log(p)DS(p) | DS(p)    | min rec length | breakpoints         |                       |                   |
|---------------|------------------|----------------|----------------|-------------|-----|----|--------|-----------------|----------|----------------|---------------------|-----------------------|-------------------|
| 605           | 605_W29_h8       | 605_W23_MK18   | 605_W29_f4     | 71          | 48  | 43 | 0      | -23.65          | 0        | 3.20E-20       | 183                 | 384-445 & 735-737     |                   |
|               | 605_W29_h8       | 605_W23_MK18   | 605_W29_b8     | 71          | 48  | 43 | 0      | -23.65          | 0        | 3.20E-20       | 183                 | 384-445 & 735-737     |                   |
|               | 605_W29_h8       | 605_W23_MK18   | 605_W29_g12    | 71          | 48  | 43 | 0      | -23.65          | 0        | 3.20E-20       | 183                 | 384-445 & 735-737     |                   |
|               | 605_W29_h8       | 605_W23_MK18   | 605_W29_g2     | 71          | 48  | 43 | 0      | -23.65          | 0        | 3.20E-20       | 183                 | 384-445 & 735-737     |                   |
|               | 12/605_W29_b8    | 605_W23_MC1    | 605_W27_b2     | 57          | 30  | 25 | 0      | -14.03          | 0        | 1.36E-10       | 235                 | 266-384 & 780-781     |                   |
|               | 12/605_W29_b8    | 605_W23_MC1    | 605_W29_f2     | 57          | 30  | 25 | 0      | -14.03          | 0        | 1.36E-10       | 235                 | 266-384 & 780-781     |                   |
|               | 12/605_W29_b8    | 605_W23_MC1    | 605_W29_d4     | 57          | 30  | 25 | 0      | -14.03          | 0        | 1.36E-10       | 235                 | 266-384 & 780-781     |                   |
|               | 12/605_W29_b8    | 605_W23_MC1    | 605_W29_b6     | 57          | 30  | 25 | 0      | -14.03          | 0        | 1.36E-10       | 235                 | 266-384 & 780-781     |                   |
|               | 12/605_W29_b8    | 605_W23_MC1    | 605_W29_a12    | 57          | 30  | 25 | 0      | -14.03          | 0        | 1.36E-10       | 235                 | 266-384 & 780-781     |                   |
|               | 12/605_W29_b8    | 605_W23_MC1    | 605_W29_h8     | 57          | 30  | 25 | 0      | -14.03          | 0        | 1.36E-10       | 235                 | 266-384 & 780-781     |                   |
|               | 608              | 608_D14_MA7    | 608_W23_MO19   | 608_W27_g12 | 111 | 45 | 27     | 0               | -14.41   | 0              | 3.68E-10            | 385                   | 147-194 & 728-730 |
|               |                  | 608_D14_MA7    | 608_W23_MO19   | 608_W27_d12 | 118 | 39 | 28     | 0               | -18.69   | 0              | 1.92E-14            | 307                   | 147-194 & 623-671 |
| 608_W29_P2_A7 |                  | 608_D14_MJ8    | 608_W29_P1_F7  | 106         | 64  | 38 | 0      | -15.36          | 0        | 4.09E-11       | 581                 | 343-368 & 1050-1053   |                   |
| 608_D14_MA9   |                  | 608_W29_P3_A8  | 608_W29_P1_G8  | 127         | 44  | 26 | 0      | -15.22          | 0        | 5.72E-11       | 275                 | 354-383 & 792-813     |                   |
| 608_W29_b11   |                  | 608_W23_MR14   | 608_W29_P1_F1  | 131         | 31  | 24 | 0      | -19.46          | 0        | 3.25E-15       | 550                 | 26-89 & 803-842       |                   |
| 608_W29_b11   |                  | 608_W23_MR14   | 608_W29_P1_H8  | 131         | 31  | 24 | 0      | -19.46          | 0        | 3.25E-15       | 550                 | 26-89 & 803-842       |                   |
| 608_W29_P2_A7 |                  | 608_D14_MJ8    | 608_W29_P3_A8  | 105         | 64  | 37 | 0      | -14.52          | 0        | 2.84E-10       | 575                 | 343-368 & 1050-1053   |                   |
| 608_W29_b11   |                  | 608_W23_MR14   | 608_W29_P2_A7  | 132         | 31  | 24 | 0      | -19.53          | 0        | 2.78E-15       | 550                 | 26-89 & 803-842       |                   |
| 608_D14_MA9   |                  | 608_W29_P3_A8  | 608_W29_P2_C4  | 126         | 45  | 26 | 0      | -14.77          | 0        | 1.59E-10       | 275                 | 354-383 & 792-813     |                   |
| 608_W29_b11   |                  | 608_D14_MJ8    | 608_W29_P2_E3  | 63          | 104 | 95 | 0      | -30.8           | 0        | 1.49E-26       | 650                 | 843-928 & 3057-3081   |                   |
| 608_W29_b11   |                  | 608_W23_MR14   | 608_W29_H7     | 130         | 33  | 24 | 0      | -18.24          | 0        | 5.43E-14       | 550                 | 26-89 & 803-842       |                   |
| 608_W29_P2_A7 |                  | 608_D14_MJ8    | 608_W29_P2_A3  | 106         | 63  | 37 | 0      | -15.01          | 0        | 9.18E-11       | 575                 | 343-368 & 1050-1053   |                   |
| 608_W29_P2_A7 |                  | 608_D14_MJ8    | 608_W29_E3     | 106         | 63  | 37 | 0      | -15.01          | 0        | 9.18E-11       | 575                 | 343-368 & 1050-1053   |                   |
| 608_D14_MA7   |                  | 608_W29_P3_A8  | 608_W29_H4     | 108         | 39  | 25 | 0      | -14.75          | 0        | 1.68E-10       | 38                  | 491-566 & 623-685     |                   |
| 608_W29_b11   |                  | 608_W23_MR14   | 608_W29_G10    | 129         | 33  | 24 | 0      | -18.17          | 0        | 6.38E-14       | 550                 | 26-89 & 803-842       |                   |
| 608_W29_b11   |                  | 608_W23_MR14   | 608_W29_G4     | 131         | 31  | 24 | 0      | -19.46          | 0        | 3.25E-15       | 550                 | 26-89 & 803-842       |                   |
| 608_D14_MA7   |                  | 608_D14_MA15   | 608_W29_G2     | 115         | 38  | 23 | 0      | -13.82          | 0        | 1.44E-09       | 38                  | 484-566 & 623-635     |                   |
| 608_D14_MA7   |                  | 608_W23_MO19   | 608_W29_F10    | 111         | 45  | 27 | 0      | -14.41          | 0        | 3.68E-10       | 385                 | 147-194 & 728-730     |                   |
| 608_W29_P2_A7 | 608_W29_P2_E3    | 608_W29_b11    | 118            | 64          | 64  | 0  | -44.85 | 0               | 1.32E-40 | 686            | 0-46 & 923-928      |                       |                   |
| 608_W29_b11   | 608_W23_MR14     | 608_W29_A9     | 132            | 31          | 24  | 0  | -19.53 | 0               | 2.78E-15 | 550            | 26-89 & 803-842     |                       |                   |
| 608_W29_b11   | 608_W23_MR14     | 608_W29_A2     | 131            | 31          | 24  | 0  | -19.46 | 0               | 3.25E-15 | 550            | 26-89 & 803-842     |                       |                   |
| 608_W29_P2_A7 | 608_D14_MJ8      | 608_W29_G11    | 106            | 63          | 37  | 0  | -15.01 | 0               | 9.18E-11 | 575            | 343-368 & 1050-1053 |                       |                   |
| 608_W29_b11   | 608_W23_MR14     | 608_W29_P3_E4  | 131            | 32          | 24  | 0  | -18.87 | 0               | 1.28E-14 | 550            | 26-89 & 803-842     |                       |                   |
| 609           | 609_D14_MI23     | 609_D14_MI8    | 609_W29_h7     | 12          | 19  | 19 | 0      | -7.036          | 9E-04    | 8.56E-04       | 678                 | 0-1 & 885-1332        |                   |
|               | 609_D14_MI23     | 609_D14_MI8    | 609_W29_d7     | 12          | 20  | 20 | 0      | -7.24           | 5E-04    | 5.35E-04       | 678                 | 0-1 & 885-1332        |                   |
|               | 609_D14_MI23     | 609_D14_MI8    | 609_W29_h12    | 12          | 20  | 20 | 0      | -7.24           | 5E-04    | 5.35E-04       | 678                 | 0-1 & 885-1332        |                   |
|               | 609_D14_MI23     | 609_D14_MI8    | 609_W29_g4     | 12          | 20  | 20 | 0      | -7.24           | 5E-04    | 5.35E-04       | 678                 | 0-1 & 885-1332        |                   |
|               | 609_D14_MI23     | 609_D14_MI8    | 609_W29_f7     | 12          | 20  | 20 | 0      | -7.24           | 5E-04    | 5.35E-04       | 678                 | 0-1 & 885-1332        |                   |
|               | 609_D14_MI23     | 609_D14_MI8    | 609_W29_e6     | 12          | 20  | 20 | 0      | -7.24           | 5E-04    | 5.35E-04       | 678                 | 0-1 & 885-1332        |                   |
|               | 609_D14_MI23     | 609_D14_MI8    | 609_W29_e4     | 12          | 20  | 20 | 0      | -7.24           | 5E-04    | 5.35E-04       | 678                 | 0-1 & 885-1332        |                   |
|               | 609_D14_MI23     | 609_D14_MI8    | 609_W29_d10    | 12          | 20  | 20 | 0      | -7.24           | 5E-04    | 5.35E-04       | 678                 | 0-1 & 885-1332        |                   |
|               | 609_D14_MI23     | 609_D14_MI8    | 609_W29_a11    | 12          | 20  | 20 | 0      | -7.24           | 5E-04    | 5.35E-04       | 678                 | 0-1 & 885-1332        |                   |
|               | 609_D14_MI23     | 609_D14_MI8    | 609_W29_a7     | 12          | 19  | 19 | 0      | -7.036          | 9E-04    | 8.56E-04       | 678                 | 0-1 & 885-1332        |                   |
|               | 609_W29_e4       | 609_D14_MH15   | 609_W29_a4     | 27          | 10  | 10 | 0      | -7.095          | 8E-04    | 7.47E-04       | 1037                | 1696-1826 & 3039-3045 |                   |
|               | 609_W29_d10      | 609_D14_MH15   | 609_W29_a4     | 27          | 10  | 10 | 0      | -7.095          | 8E-04    | 7.47E-04       | 1037                | 1696-1826 & 3039-3045 |                   |
| 609_D14_MI23  | 609_D14_MI8      | 609_W29_h8     | 12             | 20          | 20  | 0  | -7.24  | 5E-04           | 5.35E-04 | 678            | 0-1 & 885-1332      |                       |                   |
| 611           | 611_W23_P8_A6_FL | 611_D14_2C_9   | 611_W31_P1_E9  | 76          | 74  | 61 | 0      | -23.94          | 0        | 1.20E-19       | 817                 | 572-572 & 1508-1550   |                   |
|               | 611_W23_P8_A6_FL | 611_D14_2C_9   | 611_W31_P1_C4  | 76          | 74  | 61 | 0      | -23.94          | 0        | 1.20E-19       | 817                 | 572-572 & 1508-1550   |                   |
|               | 611_W23_P8_A6_FL | 611_D14_2C_9   | 611_W31_P1_A12 | 76          | 74  | 61 | 0      | -23.94          | 0        | 1.20E-19       | 817                 | 572-572 & 1508-1550   |                   |
|               | 611_W23_P8_A6_FL | 611_D14_2C_9   | 611_W31_P1_C7  | 76          | 74  | 61 | 0      | -23.94          | 0        | 1.20E-19       | 817                 | 572-572 & 1508-1550   |                   |
|               | 611_W23_P8_A6_FL | 611_D14_2C_9   | 611_W31_P1_F3  | 76          | 74  | 61 | 0      | -23.94          | 0        | 1.20E-19       | 817                 | 572-572 & 1508-1550   |                   |
|               | 611_W23_P8_A6_FL | 611_D14_2C_9   | 611_W31_P1_H9  | 76          | 74  | 61 | 0      | -23.94          | 0        | 1.20E-19       | 817                 | 572-572 & 1508-1550   |                   |
|               | 611_W23_P8_A6_FL | 611_D14_2C_9   | 611_W31_P2_F11 | 76          | 74  | 61 | 0      | -23.94          | 0        | 1.20E-19       | 817                 | 572-572 & 1508-1550   |                   |
|               | 611_W23_P8_A6_FL | 611_D14_2C_9   | 611_W31_P2_H7  | 76          | 74  | 61 | 0      | -23.94          | 0        | 1.20E-19       | 817                 | 572-572 & 1508-1550   |                   |
|               | 611_W23_P8_A6_FL | 611_D14_2C_9   | 611_W31_P1_D9  | 76          | 74  | 61 | 0      | -23.94          | 0        | 1.20E-19       | 817                 | 572-572 & 1508-1550   |                   |
|               | 611_W23_P8_A6_FL | 611_D14_2C_9   | 611_W31_P1_C3  | 76          | 74  | 61 | 0      | -23.94          | 0        | 1.20E-19       | 817                 | 572-572 & 1508-1550   |                   |
|               | 611_W23_P8_A6_FL | 611_D14_2C_9   | 611_W31_P2_C3  | 76          | 74  | 61 | 0      | -23.94          | 0        | 1.20E-19       | 817                 | 572-572 & 1508-1550   |                   |
|               | 611_W23_P8_A6_FL | 611_D14_2C_9   | 611_W31_P2_G2  | 76          | 74  | 61 | 0      | -23.94          | 0        | 1.20E-19       | 817                 | 572-572 & 1508-1550   |                   |
|               | 611_W23_P8_A6_FL | 611_D14_2C_9   | 611_W31_P1_B10 | 76          | 74  | 61 | 0      | -23.94          | 0        | 1.20E-19       | 817                 | 572-572 & 1508-1550   |                   |
|               | 611_W23_P8_A6_FL | 611_D14_2C_9   | 611_W31_P1_C10 | 75          | 75  | 61 | 0      | -22.97          | 0        | 1.12E-18       | 817                 | 572-572 & 1508-1550   |                   |
|               | 611_W23_P8_A6_FL | 611_D14_2C_9   | 611_W31_B10    | 76          | 74  | 61 | 0      | -23.94          | 0        | 1.20E-19       | 817                 | 572-572 & 1508-1550   |                   |
|               | 611_W23_P8_A6_FL | 611_D14_2C_9   | 611_W31_P1_F9  | 76          | 74  | 61 | 0      | -23.94          | 0        | 1.20E-19       | 817                 | 572-572 & 1508-1550   |                   |
|               | 611_W23_P8_A6_FL | 611_D14_2C_9   | 611_W31_P1_A10 | 77          | 73  | 59 | 0      | -22.93          | 0        | 1.21E-18       | 817                 | 572-572 & 1508-1550   |                   |
|               | 611_W23_P8_A6_FL | 611_D14_2C_9   | 611_W31_P1_B11 | 76          | 74  | 61 | 0      | -23.94          | 0        | 1.20E-19       | 817                 | 572-572 & 1508-1550   |                   |
|               | 611_W23_P8_A6_FL | 611_D14_2C_9   | 611_W31_P1_C12 | 76          | 74  | 61 | 0      | -23.94          | 0        | 1.20E-19       | 817                 | 572-572 & 1508-1550   |                   |
|               | 611_W23_P8_A6_FL | 611_D14_2C_9   | 611_W31_P1_D12 | 76          | 74  | 61 | 0      | -23.94          | 0        | 1.20E-19       | 817                 | 572-572 & 1508-1550   |                   |
|               | 611_W23_P8_A6_FL | 611_D14_2C_9   | 611_W31_P2_C6  | 77          | 73  | 59 | 0      | -22.93          | 0        | 1.21E-18       | 817                 | 572-572 & 1508-1550   |                   |
|               | 611_W23_P8_A6_FL | 611_D14_2C_9   | 611_W31_P2_C12 | 76          | 74  | 61 | 0      | -23.94          | 0        | 1.20E-19       | 817                 | 572-572 & 1508-1550   |                   |
|               | 611_W23_P8_A6_FL | 611_D14_2C_9   | 611_W31_P2_G7  | 76          | 74  | 61 | 0      | -23.94          | 0        | 1.20E-19       | 817                 | 572-572 & 1508-1550   |                   |
|               | 611_W23_P8_A6_FL | 611_D14_2C_9   | 611_W31_P1_B12 | 76          | 74  | 61 | 0      | -23.94          | 0        | 1.20E-19       | 817                 | 572-572 & 1508-1550   |                   |
| 611_W31_P2_D8 | 611_W23_2C_5     | 611_W31_P1_C5  | 101            | 15          | 15  | 0  | -16.43 | 0               | 3.84E-12 | 23             | 321-461 & 483-573   |                       |                   |
| 611_W31_P2_D8 | 611_W23_2C_5     | 611_W31_P1_D10 | 101            | 15          | 15  | 0  | -16.43 | 0               | 3.84E-12 | 23             | 321-461 & 483-573   |                       |                   |
| 611_W23_2C_9  | 611_W23_P8_B1_FL | 611_W31_P2_D8  | 35             | 63          | 52  | 0  | -11.27 | 0               | 5.55E-07 | 1023           | 460-574 & 1761-1805 |                       |                   |
| 613           | 613_W23_P7_H3_FL | 613_W23_MS3    | 613_W37_d7     | 72          | 31  | 18 | 0      | -8.552          | 2E-04    | 1.93E-04       | 28                  | 1433-1433 & 1502-1602 |                   |
|               | 613_W23_P7_H3_FL | 613_W23_MS3    | 613_W37_b9     | 72          | 31  | 18 | 0      | -8.552          | 2E-04    | 1.93E-04       | 28                  | 1433-1433 & 1502-1602 |                   |
|               | 613_W23_P7_H3_FL | 613_W23_MS3    | 613_W37_g8     | 72          | 31  | 18 | 0      | -8.552          | 2E-04    | 1.93E-04       | 28                  | 1433-1433 & 1502-1602 |                   |
|               | 613_W23_P7_H3_FL | 613_W23_MS3    | 613_W37_e1     | 72          | 31  | 18 | 0      | -8.552          | 2E-04    | 1.93E-04       | 28                  | 1433-1433 & 1502-1602 |                   |
|               | 613_W23_P7_H3_FL | 613_W23_MS3    | 613_W37_d11    | 72          | 31  | 18 | 0      | -8.552          | 2E-04    | 1.93E-04       | 28                  | 1433-1433 & 1502-1602 |                   |
|               | 613_W23_P7_H3_FL | 613_W23_MS3    | 613_W37_c12    | 72          | 31  | 18 | 0      | -8.552          | 2E-04    | 1.93E-04       | 28                  | 1433-1433 & 1502-1602 |                   |
|               | 613_W23_P7_H3_FL | 613_W23_MS3    | 613_W37_a1     | 72          | 31  | 18 | 0      | -8.552          | 2E-04    | 1.93E-04       | 28                  | 1433-1433 & 1502-1602 |                   |
|               | 613_W23_P7_H3_FL | 613            |                |             |     |    |        |                 |          |                |                     |                       |                   |
